# Supplementary material for: Fenofibrate Inhibits Subretinal Fibrosis Through Suppressing TGF‐β—Smad2/3 signaling and Wnt signaling in Neovascular Age‐Related Macular Degeneration
Source: PubMed Central journal article supplement (PMC7797782; doi:10.3389/fphar.2020.580884), 2020-11-17
Supplement: datasheet1.pdf [file datasheet1.pdf]

## Supplemental Figures and Figure Legends

**Supplemental Figure 1. Collagen deposition at different ages of *Vldlr*<sup>-/-</sup> mice.** Representative images of Masson staining of Collagen deposition in the lesion sites of *Vldlr*<sup>-/-</sup> mice at ages of 2 months, 3 months, 5 months and 8 months.

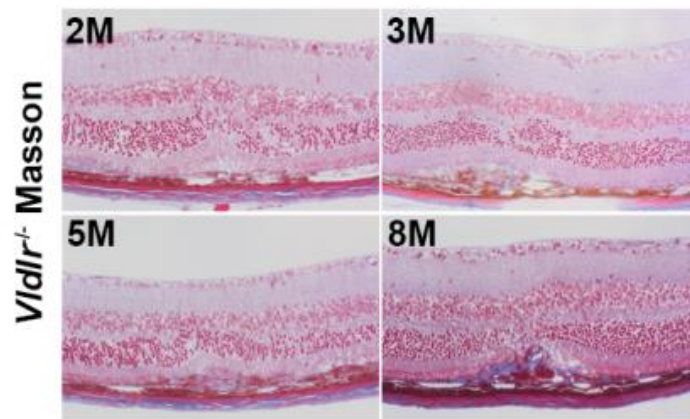

Supplemental figure 1

**Supplemental Figure 2. Fenofibrate upregulates ACOX1 expression in the retina.** (A, B) The protein expressions of ACOX-1 were measured in the retinas of WT mice and *Vldlr*<sup>-/-</sup> mice fed with control chow (*Vldlr*<sup>-/-</sup>+VEH) or fenofibrate chow (*Vldlr*<sup>-/-</sup>+Feno) by Western blot analysis and quantified by densitometry. (mean±SEM; n=8. N.S.= non-significant, \*\*\*p<0.001)

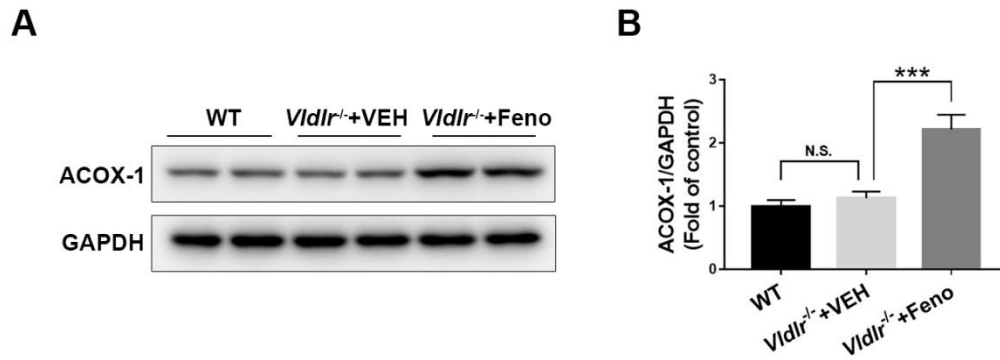

Supplemental figure 2

**Supplemental Figure 3. Different concentrations of fenofibric acid (FA) on viabilities of rMC-1 cells.** The cell proliferation assay was performed in rMC-1 cells treated with different concentrations of FA as shown in the figure. No toxic effect of FA was observed at the concentrations of 10, 50, 100, 200 $\mu$ M. (mean $\pm$ SEM; n=3. \*\*P<0.01, \*\*\*p<0.001)

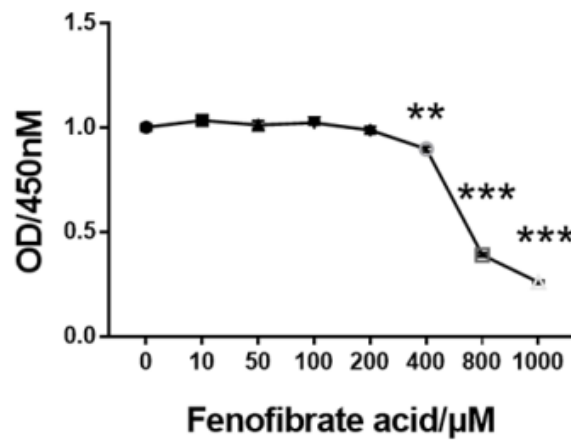

Supplemental figure 3
